# Supplementary material
Source: publisher site journal article supplement (https://www.dovepress.com/article/447300)
Supplement: Supplementary file 1 [file get_supplementary_file.php]

**Supplementary Material Table S1.** Blood biochemistry parameters of the study population in the NM and OB groups

| **Variables** | **NM (N-248)** | | | | **OB (N=331)** | | | |
| --- | --- | --- | --- | --- | --- | --- | --- | --- |
| **Tertile1  (-3.24 ~ -0.79) (N=88)** | **Tertile2  (-0.78 ~ 0.77) (N=79)** | **Tertile3 (0.79 ~ 2.97) (N=81)** | ***P*** | **Tertile1  (-3.46 ~ -0.81) (N=105)** | **Tertile2  (-0.77 ~ 0.77) (N=114)** | **Tertile3  (0.80 ~ 3.58) (N=112)** | ***P*** |
| **Mean ± SD or n (%)** | **Mean ± SD or n (%)** | **Mean ± SD or n (%)** | **Mean ± SD or n (%)** | **Mean ± SD or n (%)** | **Mean ± SD or n (%)** |
| TC (mmol/L) | 5.33±0.99 | 5.22±1.05 | 5.31±1.10 | 0.571 | 5.30±1.08 | 5.11±1.09 | 5.22±1.03 | 0.419 |
| TG (mmol/L) | 1.26±1.04 | 1.53±1.12 | 1.45±0.93 | 0.053 | 1.79±1.08 | 2.00±1.30 | 1.92±1.17 | 0.479 |
| HDL-C (mmol/L) | 1.54±0.32 | 1.50±0.33 | 1.48±0.33 | 0.394 | 1.35±0.29 | 1.32±0.30 | 1.36±0.31 | 0.775 |
| LDL-C (mmol/L) | 3.17±0.78 | 3.09±0.81 | 3.19±0.83 | 0.544 | 3.30±0.82 | 3.17±0.87 | 3.21±0.82 | 0.436 |
| FBG (mmol/L) | 6.34±3.53 | 6.21±2.61 | 5.82±2.65 | 0.315 | 6.32±2.32 | 6.15±2.00 | 6.62±2.81 | 0.35 |
| ApoE (mg/L) | 50.90±15.71 | 52.97±14.55 | 51.36±13.86 | 0.479 | 56.09±19.18 | 55.74±16.32 | 56.72±16.68 | 0.838 |
| TC (mmol/L) | 5.33±0.99 | 5.22±1.05 | 5.31±1.10 | 0.571 | 5.30±1.08 | 5.11±1.09 | 5.22±1.03 | 0.419 |

Data were tested for normality and expressed as mean ± standard deviation (SD), the comparisons among three groups were performed using the Kruskal-Wallis H test. ApoE: apolipoprotein E; FBG: fasting blood glucose; HDL-C: high-density lipoprotein cholesterol; LDL-C: low-density lipoprotein cholesterol; MoCA: Montreal cognitive assessment; NM: normal weight group; OB: obese group; TC: total cholesterol; TG: total triglyceride; SD: standard deviation.

**Supplementary Material Table S2.** β values of DII in linear regression models between DII and the fatty acid composition of the erythrocyte membranes after adjusting for different covariates

| **Variables** | **NM** | | | | | | | |  | **OB** | | | | | | | |
| --- | --- | --- | --- | --- | --- | --- | --- | --- | --- | --- | --- | --- | --- | --- | --- | --- | --- |
| **Model 1** | |  | **Model 2** | |  | **Model 3** | |  | **Model 1** | |  | **Model 2** | |  | **Model 3** | |
| **β (95% CI)** | ***P*** |  | **β (95% CI)** | ***P*** |  | **β (95% CI)** | ***P*** |  | **β (95% CI)** | ***P*** |  | **β (95% CI)** | ***P*** |  | **β (95% CI)** | ***P*** |
| C15:0 % | 0.124(0.003, 0.246) | 0.045* |  | 0.116(-0.008, 0.239) | 0.067 |  | 0.118(-0.006, 0.243) | 0.063 |  | -0.118(-0.326, 0.089) | 0.262 |  | -0.147(-0.354, 0.06) | 0.162 |  | -0.140(-0.348, 0.069) | 0.188 |
| C16:0 % | 0.120(-0.448, 0.688) | 0.677 |  | 0.149(-0.43, 0.728) | 0.613 |  | 0.128(-0.448, 0.705) | 0.662 |  | -0.587(-1.130, -0.045) | 0.034* |  | -0.625(-1.160, -0.089) | 0.022* |  | -0.590(-1.128, -0.052) | 0.032* |
| C23:0 % | 0.010(-0.001, 0.021) | 0.076 |  | 0.012(0.000, 0.023) | 0.050 |  | 0.012(0.000, 0.024) | 0.045* |  | 0.005(-0.002, 0.012) | 0.132 |  | 0.005(-0.002, 0.012) | 0.131 |  | 0.005(-0.002, 0.012) | 0.138 |
| C24:0 % | 0.022(0.006, 0.038) | 0.007** |  | 0.027(0.010, 0.043) | 0.001** |  | 0.028(0.012, 0.044) | 0.001** |  | -0.005(-0.023, 0.014) | 0.623 |  | -0.005(-0.023, 0.014) | 0.599 |  | -0.005(-0.023, 0.014) | 0.614 |
| SFA % | 0.256(-0.629, 1.141) | 0.569 |  | 0.259(-0.643, 1.160) | 0.572 |  | 0.289(-0.617, 1.195) | 0.531 |  | -0.734(-1.667, 0.199) | 0.123 |  | -0.824(-1.742, 0.095) | 0.079 |  | -0.768(-1.690, 0.154) | 0.102 |
| MUFA % | 0.012(-0.218, 0.243) | 0.915 |  | 0.022(-0.211, 0.255) | 0.854 |  | 0.005(-0.230, 0.240) | 0.965 |  | 0.267(-0.011, 0.544) | 0.059 |  | 0.283(0.005, 0.560) | 0.046* |  | 0.266(-0.013, 0.545) | 0.062 |
| C20:4n-6 % | 0.007(-0.457, 0.470) | 0.978 |  | -0.004(-0.477, 0.469) | 0.988 |  | -0.050(-0.526, 0.426) | 0.836 |  | 0.510(0.009, 1.010) | 0.046* |  | 0.564(0.069, 1.059) | 0.026* |  | 0.559(0.061, 1.057) | 0.028* |
| n-6 % | -0.249(-0.926, 0.428) | 0.470 |  | -0.244(-0.935, 0.447) | 0.487 |  | -0.272(-0.966, 0.422) | 0.440 |  | 0.718(-0.034, 1.469) | 0.061 |  | 0.783(0.039, 1.526) | 0.039* |  | 0.755(0.007, 1.502) | 0.048 |
| n-3 % | -0.014(-0.234, 0.206) | 0.900 |  | -0.031(-0.254, 0.191) | 0.782 |  | -0.018(-0.237, 0.202) | 0.874 |  | -0.251(-0.605, 0.103) | 0.164 |  | -0.242(-0.600, 0.115) | 0.183 |  | -0.252(-0.612, 0.108) | 0.169 |
| PUFA % | -0.269(-1.019, 0.482) | 0.481 |  | -0.280(-1.047, 0.486) | 0.472 |  | -0.294(-1.065, 0.477) | 0.453 |  | 0.467(-0.340, 1.274) | 0.256 |  | 0.541(-0.256, 1.339) | 0.183 |  | 0.502(-0.299, 1.303) | 0.218 |
| n-6/n-3 % | -0.198(-0.414, 0.019) | 0.073 |  | -0.190(-0.408, 0.028) | 0.087 |  | -0.189(-0.406, 0.028) | 0.087 |  | 0.241(0.054, 0.429) | 0.012* |  | 0.235(0.046, 0.425) | 0.015* |  | 0.236(0.045, 0.428) | 0.016* |

95%CI: 95% Confidence interval; MUFA, monounsaturated fatty acids; n-3, omega-3 fatty acids; n-6, omega-6 fatty acids; NM: normal weight group; OB: obese group; PUFA, polyunsaturated fatty acids; SFA, saturated fatty acids; Model 1: adjusted for age, gender, waist-hip ratio, energy intake, culture; Model 2: adjusted for the variables in Model 1 plus lifestyle (smoking, drinking and exercise); Model 3: adjusted for the variables in Model 2 plus disease (history of hypertension, diabetes mellitus, hypertriglyceridemia) ***P<*0.01, **P<*0.05.

**Supplementary Material Table S3.** Total and direct effect of chain mediation effect model

| Effect | Effect Value | Bootstrap SE | Boot CI Lower | Boot CI Upper |
| --- | --- | --- | --- | --- |
| Total effect | -0.3886 | 0.1750 | -0.7330 | -0.0443 |
| Direct effect |  |  |  |  |
| Model 1 | -0.3636 | 0.1761 | -0.7101 | -0.0171 |
| Model 2 | -0.3890 | 0.1757 | -0.7347 | -0.0434 |
| Model 3 | -0.3573 | 0.1755 | -0.7027 | -0.0120 |
| Model 4 | -0.3873 | 0.1760 | -0.7335 | -0.0410 |
| Model 5 | -0.3885 | 0.1755 | -0.7338 | -0.0432 |
| Model 6 | -0.4086 | 0.1747 | -0.7524 | -0.0648 |
| Model 7 | -0.3785 | 0.1758 | -0.7245 | -0.0325 |
| Model 8 | -0.3904 | 0.1749 | -0.7346 | -0.0463 |
| Model 9 | -0.3700 | 0.1764 | -0.7171 | -0.0229 |
| Model 10 | -0.3843 | 0.1754 | -0.7295 | -0.0392 |
| Model 11 | -0.3958 | 0.1748 | -0.7398 | -0.0519 |
| Model 12 | -0.3850 | 0.1753 | -0.7300 | -0.0400 |
| Model 13 | -0.3799 | 0.1760 | -0.7262 | -0.0336 |
| Model 14 | -0.3814 | 0.1756 | -0.7270 | -0.0358 |
| Model 15 | -0.3744 | 0.1757 | -0.7201 | -0.0287 |

Model 1: the proportion of C16:0 on erythrocyte membrane was used as Mediator 1 (M1), and the proportion of C11:0 on erythrocyte membrane was used as Mediator 2 (M2); Model 2: the proportion of C20:0 on erythrocyte membrane was used as M1, and the proportion of C14:1 on erythrocyte membrane was used as M2; Model 3: the proportion of SFA on erythrocyte membrane was used as M1, and the proportion of C11:0 on erythrocyte membrane was used as M2; Model 4: the proportion of MUFA on erythrocyte membrane was used as M1, and the proportion of C11:0 on erythrocyte membrane was used as M2; Model 5: the proportion of MUFA on erythrocyte membrane was used as M1, and the proportion of C13:0 on erythrocyte membrane was used as M2; Model 6: the proportion of MUFA on erythrocyte membrane was used as M1, and the proportion of C20:1 on erythrocyte membrane was used as M2; Model 7: the proportion of C18:2n-6 on erythrocyte membrane was used as M1, and the proportion of C20:5n-3 on erythrocyte membrane was used as M2; Model 8: the proportion of n-6 on erythrocyte membrane was used as M1, and the proportion of C20:1 on erythrocyte membrane was used as M2; Model 9: the proportion of n-6 on erythrocyte membrane was used as M1, and the proportion of C20:5n-3 on erythrocyte membrane was used as M2; Model 10: the proportion of C20:3n-3 on erythrocyte membrane was used as M1, and the proportion of C13:0 on erythrocyte membrane was used as M2; Model 11: the proportion of C20:3n-3 on erythrocyte membrane was used as M1, and the proportion of C18:3n-3 on erythrocyte membrane was used as M2; Model 12: the proportion of n-3 on erythrocyte membrane was used as M1, and the proportion of C11:0 on erythrocyte membrane was used as M2; Model 13: the proportion of C18:1n-9c on erythrocyte membrane was used as M1, and the proportion of C1:0 on erythrocyte membrane was used as M2; Model 14: the proportion of C18:1n-9c on erythrocyte membrane was used as M1, and the proportion of C13:0 on erythrocyte membrane was used as M2; Model 15: the proportion of n-6/n-3 on erythrocyte membrane was used as M1, and the proportion of C18:3n-3 on erythrocyte membrane was used as M2.

**Supplementary Material Table S4.** Simple indirect effect of chain mediation effect model

| Model | Effect | Effect Value | Bootstrap SE | Boot CI Lower | Boot CI Upper |
| --- | --- | --- | --- | --- | --- |
| Model 1 | Total indirect effect | -0.0251 | 0.0339 | -0.1060 | 0.0350 |
|  | DII→C16: 0%→MoCA | -0.0128 | 0.0303 | -0.0958 | 0.0346 |
|  | DII→C11: 0%→MoCA | -0.0087 | 0.0159 | -0.0391 | 0.0264 |
| Model 2 | Total indirect effect | 0.0004 | 0.0104 | -0.0270 | 0.0160 |
|  | DII→C20: 0%→MoCA | -0.0010 | 0.0095 | -0.0377 | 0.0086 |
|  | DII→C14: 1%→MoCA | 0.0014 | 0.0043 | -0.0048 | 0.0139 |
| Model 3 | Total indirect effect | -0.0313 | 0.0281 | -0.1010 | 0.0132 |
|  | DII→SFA%→MoCA | -0.0175 | 0.0212 | -0.0822 | 0.0087 |
|  | DII→C11: 0%→MoCA | -0.0173 | 0.0199 | -0.0615 | 0.0194 |
| Model 4 | Total indirect effect | -0.0014 | 0.0277 | -0.0543 | 0.0562 |
|  | DII→MUFA%→MoCA | 0.0109 | 0.0209 | -0.0234 | 0.0632 |
|  | DII→C11: 0%→MoCA | -0.0155 | 0.0177 | -0.0562 | 0.0172 |
| Model 5 | Total indirect effect | -0.0002 | 0.0272 | -0.0566 | 0.0534 |
|  | DII→MUFA%→MoCA | 0.0195 | 0.0218 | -0.0111 | 0.0795 |
|  | DII→C13: 0%→MoCA | -0.0143 | 0.0183 | -0.0669 | 0.0114 |
| Model 6 | Total indirect effect | 0.0200 | 0.0341 | -0.0398 | 0.1006 |
|  | DII→MUFA%→MoCA | 0.0019 | 0.0191 | -0.0337 | 0.0461 |
|  | DII→C20: 1%→MoCA | 0.0059 | 0.0273 | -0.0421 | 0.0710 |
| Model 7 | Total indirect effect | -0.0102 | 0.0195 | -0.0704 | 0.0130 |
|  | DII→C18: 2n-6%→MoCA | -0.0128 | 0.0191 | -0.0731 | 0.0084 |
|  | DII→C20: 5n-3%→MoCA | 0.0025 | 0.0046 | -0.0014 | 0.0177 |
| Model 8 | Total indirect effect | 0.0018 | 0.0397 | -0.0777 | 0.0829 |
|  | DII→n-6%→MoCA | -0.0158 | 0.0257 | -0.0899 | 0.0185 |
|  | DII→C20: 1%→MoCA | 0.0229 | 0.0299 | -0.0226 | 0.1010 |
| Model 9 | Total indirect effect | -0.0186 | 0.0267 | -0.0962 | 0.0156 |
|  | DII→n-6%→MoCA | -0.0213 | 0.0261 | -0.0974 | 0.0107 |
|  | DII→C20: 5n-3%→MoCA | 0.0025 | 0.0047 | -0.0017 | 0.0188 |
| Model 10 | Total indirect effect | -0.0043 | 0.0315 | -0.0680 | 0.0591 |
|  | DII→20: 3n-3%→MoCA | 0.0131 | 0.0264 | -0.0308 | 0.0769 |
|  | DII→C13: 0%→MoCA | -0.0192 | 0.0183 | -0.0745 | 0.0040 |
| Model 11 | Total indirect effect | 0.0072 | 0.0352 | -0.0574 | 0.0854 |
|  | DII→20: 3n-3%→MoCA | 0.0140 | 0.0260 | -0.0253 | 0.0831 |
|  | DII→C18: 3n-3%→MoCA | -0.0077 | 0.0230 | -0.0643 | 0.0277 |
| Model 12 | Total indirect effect | -0.0036 | 0.0288 | -0.0574 | 0.0589 |
|  | DII→n-3%→MoCA | 0.0096 | 0.0237 | -0.0251 | 0.0735 |
|  | DII→C11: 0%→MoCA | -0.0113 | 0.0175 | -0.0452 | 0.0251 |
| Model 13 | Total indirect effect | -0.0087 | 0.0273 | -0.0689 | 0.0422 |
|  | DII→C18: 1n-9c%→MoCA | 0.0038 | 0.0206 | -0.0376 | 0.0462 |
|  | DII→C11: 0%→MoCA | -0.0158 | 0.0178 | -0.0578 | 0.0153 |
| Model 14 | Total indirect effect | -0.0072 | 0.0258 | -0.0642 | 0.0394 |
|  | DII→C18: 1n-9c%→MoCA | 0.0118 | 0.0197 | -0.0185 | 0.0632 |

（continued）

**Supplementary Material Table S4** (Continued).

| Model | Effect | Effect Value | Bootstrap SE | Boot CI Lower | Boot CI Upper |
| --- | --- | --- | --- | --- | --- |
|  | DII→C13: 0%→MoCA | -0.0143 | 0.0179 | -0.0693 | 0.0085 |
| Model 15 | Total indirect effect | -0.0143 | 0.0355 | -0.0896 | 0.0506 |
|  | DII→n-6/n-3%→MoCA | -0.0075 | 0.0283 | -0.0753 | 0.0416 |
|  | DII→C18: 3n-3%→MoCA | -0.0004 | 0.0224 | -0.0491 | 0.0410 |

Model 1: the proportion of C16:0 on erythrocyte membrane was used as Mediator 1 (M1), and the proportion of C11:0 on erythrocyte membrane was used as Mediator 2 (M2); Model 2: the proportion of C20:0 on erythrocyte membrane was used as M1, and the proportion of C14:1 on erythrocyte membrane was used as M2; Model 3: the proportion of SFA on erythrocyte membrane was used as M1, and the proportion of C11:0 on erythrocyte membrane was used as M2; Model 4: the proportion of MUFA on erythrocyte membrane was used as M1, and the proportion of C11:0 on erythrocyte membrane was used as M2; Model 5: the proportion of MUFA on erythrocyte membrane was used as M1, and the proportion of C13:0 on erythrocyte membrane was used as M2; Model 6: the proportion of MUFA on erythrocyte membrane was used as M1, and the proportion of C20:1 on erythrocyte membrane was used as M2; Model 7: the proportion of C18:2n-6 on erythrocyte membrane was used as M1, and the proportion of C20:5n-3 on erythrocyte membrane was used as M2; Model 8: the proportion of n-6 on erythrocyte membrane was used as M1, and the proportion of C20:1 on erythrocyte membrane was used as M2; Model 9: the proportion of n-6 on erythrocyte membrane was used as M1, and the proportion of C20:5n-3 on erythrocyte membrane was used as M2; Model 10: the proportion of C20:3n-3 on erythrocyte membrane was used as M1, and the proportion of C13:0 on erythrocyte membrane was used as M2; Model 11: the proportion of C20:3n-3 on erythrocyte membrane was used as M1, and the proportion of C18:3n-3 on erythrocyte membrane was used as M2; Model 12: the proportion of n-3 on erythrocyte membrane was used as M1, and the proportion of C11:0 on erythrocyte membrane was used as M2; Model 13: the proportion of C18:1n-9c on erythrocyte membrane was used as M1, and the proportion of C1:0 on erythrocyte membrane was used as M2; Model 14: the proportion of C18:1n-9c on erythrocyte membrane was used as M1, and the proportion of C13:0 on erythrocyte membrane was used as M2; Model 15: the proportion of n-6/n-3 on erythrocyte membrane was used as M1, and the proportion of C18:3n-3 on erythrocyte membrane was used as M2.
